# Supplementary material for: Capturing the inherent structural dynamics of the HIV-1 envelope glycoprotein fusion peptide
Source: PubMed Central journal article supplement (PMC6377653; doi:10.1038/s41467-019-08738-5), 2019-02-15
Supplement: 41467_2019_8738_MOESM3_ESM.pdf [file 41467_2019_8738_MOESM3_ESM.pdf]

## Description of Additional Supplementary Files

**File Name:** Supplementary Movie 1.

**Description: Env trimer twisting.** The B41 SOSIP.664 trimers from the 3.5Å (red) and 3.8Å (grey) resolution structures were aligned on their gp41 C $\alpha$  coordinates to reveal twisting of the gp120 subunits relative to each other. Alignment and video rendering were done using PyMol <sup>1</sup>.

**File Name:** Supplementary Movie 2.

**Description: Protomer sub-domain movement.** Alignment of the gp41 domains of B41 SOSIP.664 Env trimer at 3.5Å (red) and 3.8Å (grey) on their C $\alpha$  coordinates show gp120 and gp41 domain movements. The gp120 sub-domain moves in an anticlockwise direction. Alignment and video rendering were done using PyMol <sup>1</sup>.

**File Name:** Supplementary Movie 3.

**Description: CD4-induced opening of trimer.** Morph between the C $\alpha$  coordinates of the open CD4/17b-bound and the closed PGT124/35O22-bound pre-fusion B41 SOSIP.664 Env trimer highlights the large movement of both the gp120 and the gp41 sub-domains. Morphing and video rendering were done using PyMol <sup>1</sup>.

### References:

1. Schrodinger L. The PyMOL Molecular Graphics System, Version 1.8. (2015).
